# Supplementary material for: CDK-dependent phosphorylation of Mob2 is essential for hyphal development in Candida albicans
Source: PubMed Central journal article supplement — Mol Biol Cell. 2011 Jul 15;22(14):2458–69. doi: 10.1091/mbc.E11-03-0205 (PMC3135472; doi:10.1091/mbc.e11-03-0205), 2011-07-15
Supplement: E11-03-0205_1.pdf [file E11-03-0205_1.pdf]

Figure S1

**A**

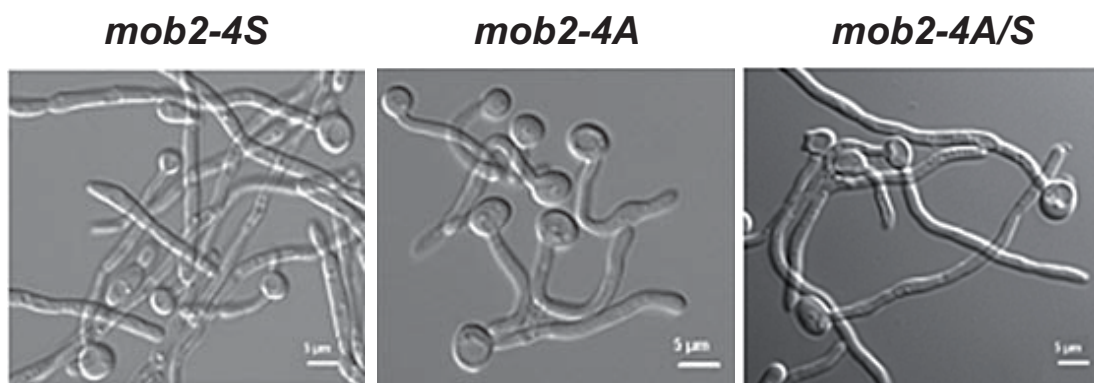

**B**

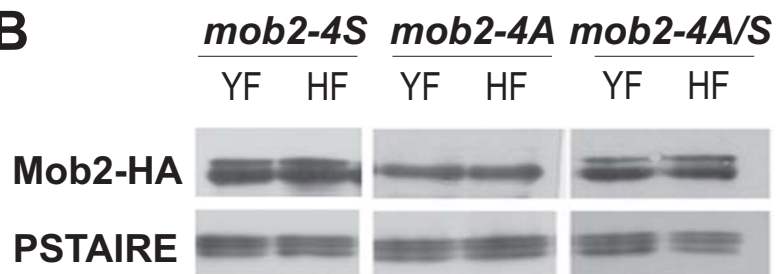

Figure S2

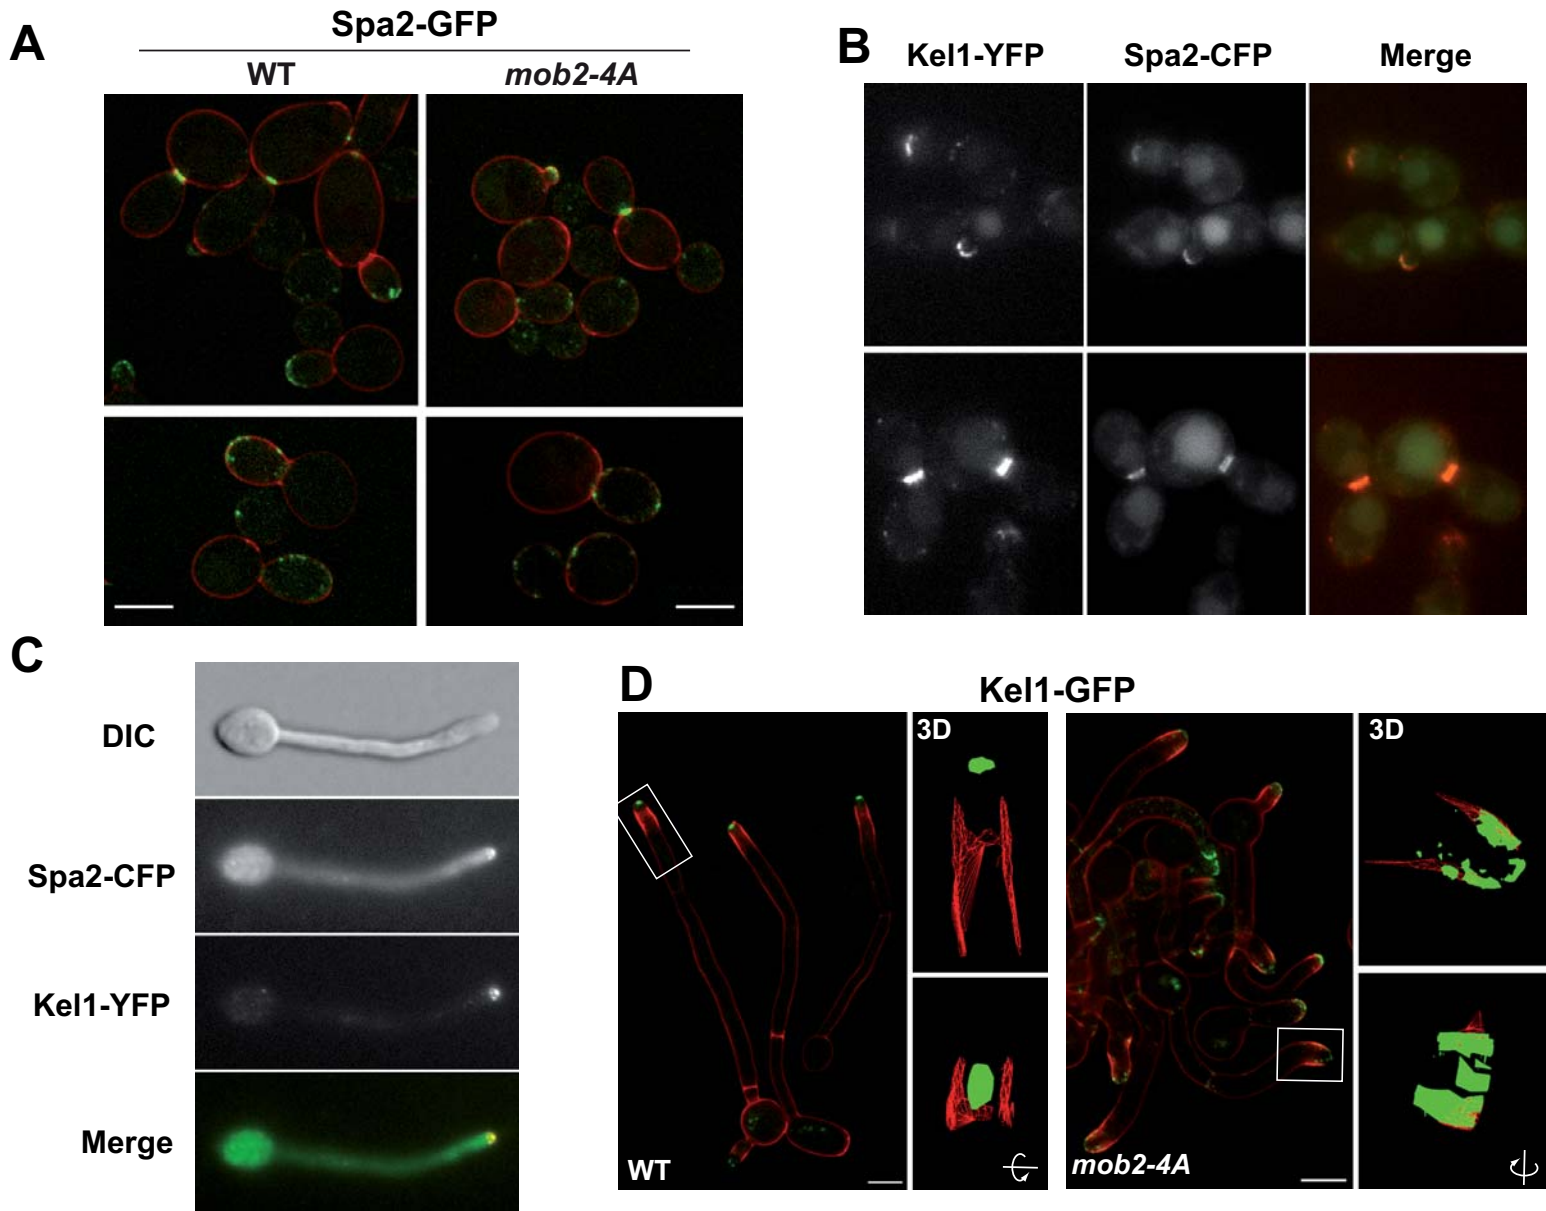

Figure S3

**A**

```

scSpa2  RDIFHYVSLKTFEVTGE--NRDRSNSTRAQKARA KLLKLSSSQFYELSTDVSDDELQRR 70
      +D+ +Y LK F ++ + +R +SNS+RAQ+AR KLLKLSS+QF ELSTDV DEL+RR
caSpa2  KDLVQHYKVLKQFLAISDDQQSRSKSNSSRAQRARE KLLKLSSAQFKELSTDVYDELRRR 63

scSpa2  IGEDANQPDYLLPKANFHMKRNQARQKLANLSQTRFNDLLDDILFEIKRRGF DKDLDAPR 130
      I E ++PDYLLPK++FH KRNQARQKLA+L QTRF DL+ DI +EI+RR + +
caSpa2  IDESRSEPDYLLPKSSFHPKRNQARQKLASLPQTRFKDLVADISYEIERRDIHVERQSQH 123

scSpa2  PPLPQ-----PMKQEVSKDSDDTA 140
caSpa2  SHTTSMSSNGSQFQHERKSSLASSHHRNDSANGYHSRSASHHHLNDFAAATKEVDEEKESDS 183
      *
      +EV ++ + +

scSpa2  RTSTNSSSVTQVA-PN-----VSVQPSLVIPKMASIDWSSEEEEEEQVKEKPNEPEGK 201
      R N++S + PN + +QPS V+P A++DWSS++E +++ +
caSpa2  RDDLNNTSSKNITMPNAEASNQSIGIQPSQVVPTKANLDWSSDDEGDDE-----Q 233

scSpa2  QTSMDEKKEAKPALNPIVTDSDLPDSQ 228
      + +EK + K +P T ++ +Q
caSpa2  EEEEEKGVKNISDPKHTQAEQHQNQ 261
  
```

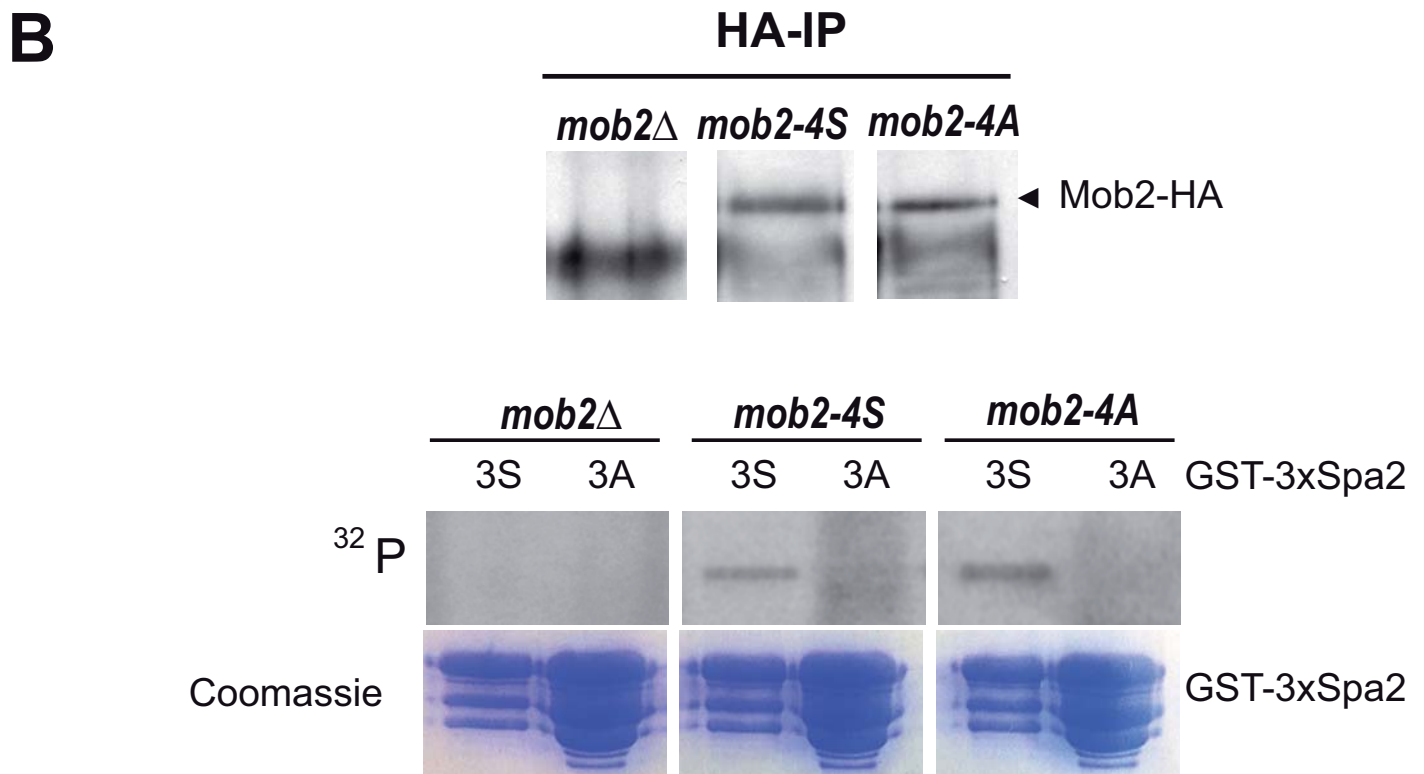

Figure S4

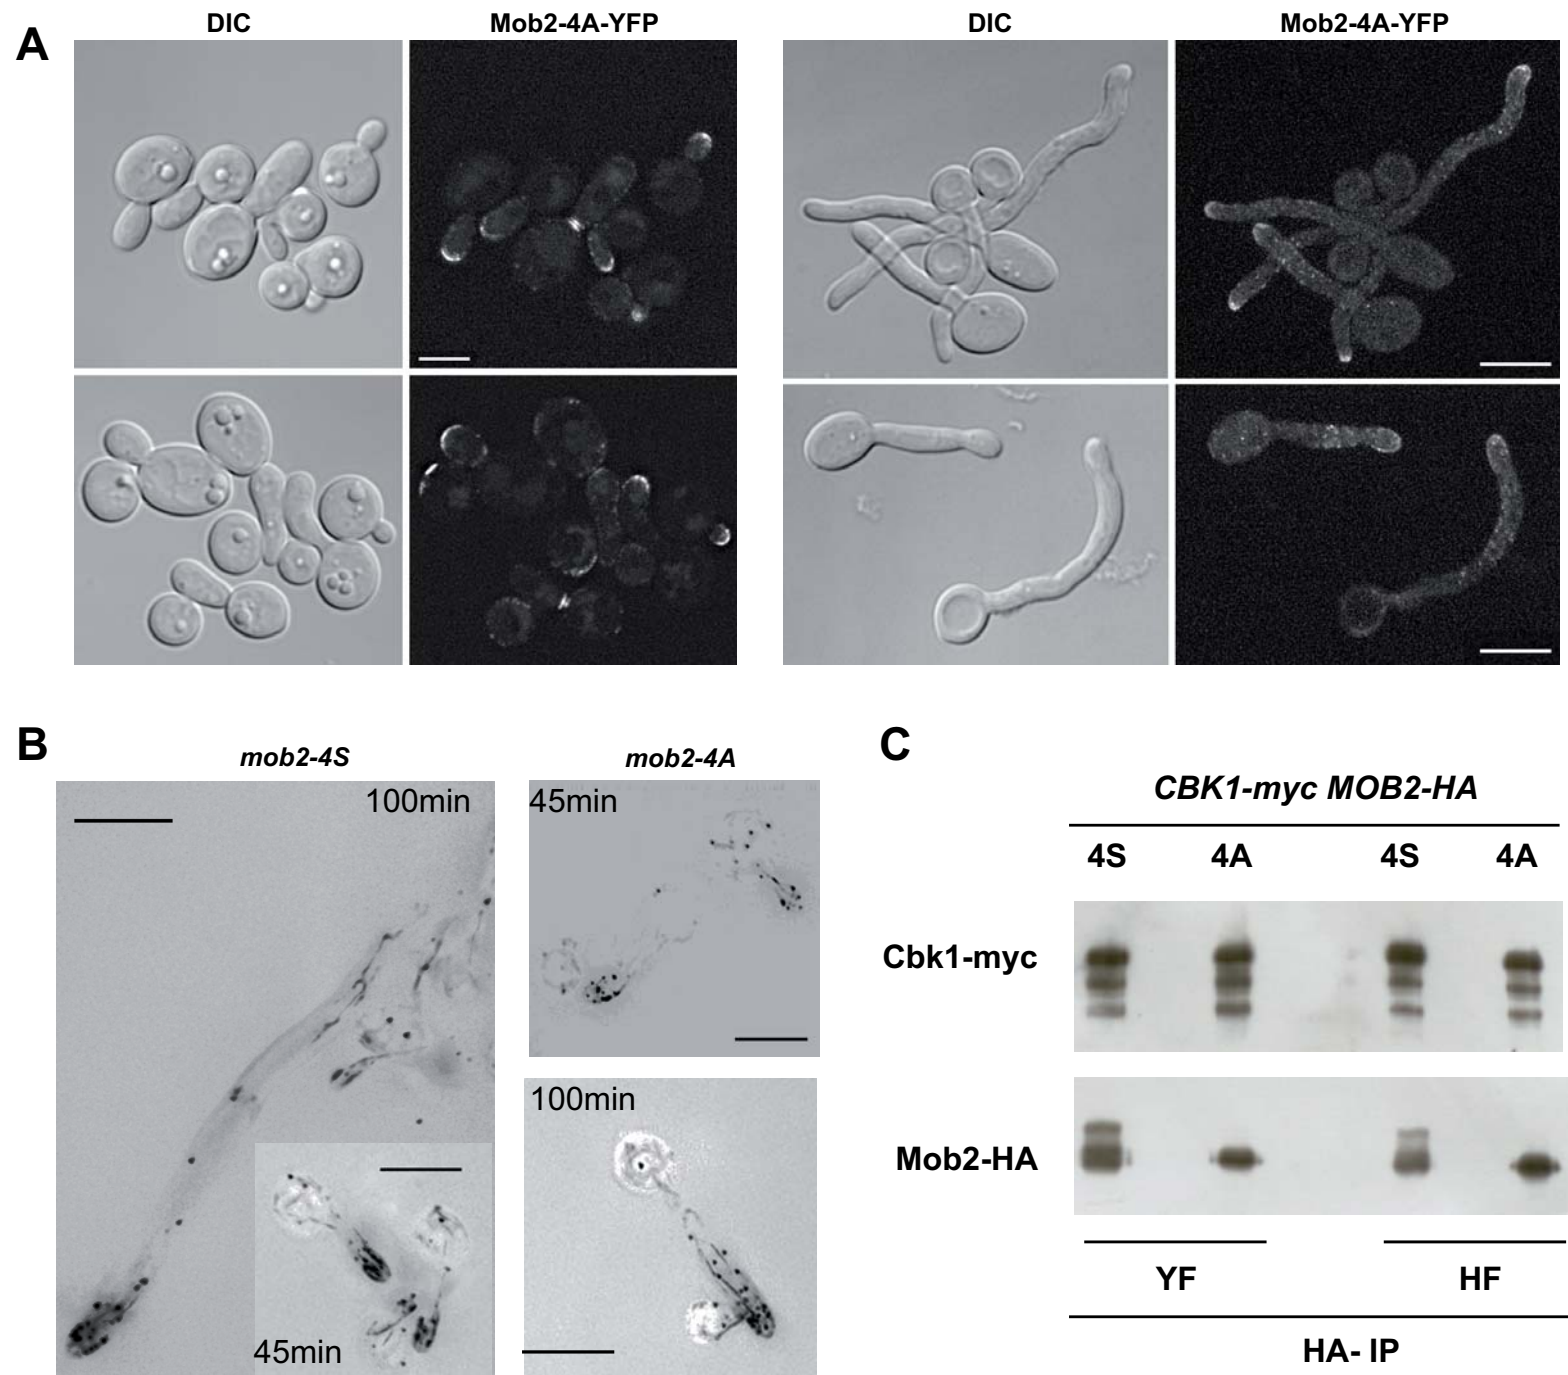

**Figure S1.** Reintroduction of Cdk consensus phosphorylation serine residues rescues the phenotype of the *mob2-4A* mutant. (A) DIC images of hyphal cultures of the JC613 (*MOB2-4S-HA/mob2Δ*), JC785 (*mob2-4A-HA/mob2Δ*) and JC843 (*MOB2-4A/S-HA/mob2Δ*) strains 4 hours after serum induction. (B) The same strains were grown under yeast- (YF) and hypha-inducing conditions (HF) for 2 hours. Protein extracts were analyzed by Western blot, using anti-HA and anti-PSTAIRE antibodies.

**Figure S2.** Colocalization of Spa2 and Kel1 in yeast and hyphal cells. (A) Spa2-GFP localization in yeast cultures of wild-type (JC961) and *mob2-4A* (JC921) strains. Spa2-GFP is shown in green, while calcofluor is shown in red. Kel1 and Spa2 colocalize in yeast (B) and hyphae (C). The JC1011 strain (*KEL1/KEL1-YFP SPA2/SPA2-CFP*) was grown in yeast and hypha-inducing conditions and analyzed with a Nikon microscope. Images of each channel and the merged image are shown. Spa2-CFP was loaded in the green channel and Kel1-YFP in the red channel. (D) Localization of Kel1-YFP in wild-type (JC1000) and *mob2-4A* (JC958) cells 150 min after hyphal induction. Kel1-GFP is shown in green, while calcofluor is shown in red. To the right of the images, 3D models generated using softWoRx from the regions indicated by rectangles are shown. The fluorescent signal is shown in green, while calcofluor is represented as a red wire frame. The second frame of each 3D model was generated by rotating the first image 90° on the indicated axis.

**Figure S3.** (A) Partial amino acid sequence alignment of *S. cerevisiae* (sc) and *C. albicans* (ca) Spa2. Rectangles show the Spa2 direct repeat elements (SDR1 and 2). Cbk1 consensus phosphorylation sites are denoted in yellow. Asterisk: S163, residue phosphorylated *in vivo* (Beltrao et al, 2009). (B) Mob2 associated kinase activity *in vitro*. Mob2 was immunoprecipitated from extracts of *MOB2-HA* (JC599), *mob2-4A-HA* (JC785) and *mob2Δ* (JC502) cells grown in hypha-inducing conditions and used in an *in vitro* kinase assay with GST-3xSpa2<sup>138-163</sup> as substrate (lanes labeled as 3S). Substitution of residues S<sup>143</sup>, S<sup>153</sup> and S<sup>163</sup> to Ala abolished <sup>32</sup>P labeling of the GST-3xSpa2 protein (lanes labeled as 3A). Protein levels of GST-3xSpa2 and Mob2-HA in the kinase reactions were confirmed by Coomassie staining and Western blotting respectively.

**Figure S4.** *mob2-4A* mutant characterization. (A) Localization of Mob2-4A-YFP (JC957) under yeast and hypha induction. (B) Negative images showing Alexa-phalloidin staining of wild-type (JC613) and *mob2-4A* (JC785) strains grown as hyphae (C) Protein extracts from wild-type *MOB2-HA* (JC413) and *mob2-4A-HA* (JC964) yeast and hyphal cultures were immunoprecipitated using anti-HA antibodies and probed by anti-myc and anti-HA antibodies.

**Supplemental Table 1.** Yeast strains used in this study

| <b>Strain<sup>a</sup></b> | <b>Genotype</b>                                                            | <b>Source</b>               |
|---------------------------|----------------------------------------------------------------------------|-----------------------------|
| BWP17                     | <i>ura3Δ::imm434/ ura3Δ::imm434::hisG/his::hisG arg4::hisG/ arg4::hisG</i> | Wilson <i>et al.</i> , 1999 |
| LCR6                      | <i>CDC28/CDC28-myc::ARG4</i>                                               | Li <i>et al.</i> , 2008     |
|                           | <i>cdc28Δ::ARG4/URA3-pMET3-cdc28as</i>                                     | Yue Wang                    |
| JC369                     | <i>CBK1-YFP-URA3/CBK1</i>                                                  | This study                  |
| JC413                     | <i>CBK1-myc-HIS1/CBK1 MOB2-HA-URA3/MOB2</i>                                | This study                  |
| JC482                     | <i>MOB2-myc::HIS1/MOB2</i>                                                 | This study                  |
| JC493                     | <i>MOB2-myc::HIS1/ mob2Δ::URA3</i>                                         | This study                  |
| JC502                     | <i>mob2Δ::ARG4/mob2Δ::HIS1</i>                                             | This study                  |
| JC524                     | <i>CBK1-YFP-URA3/CBK1 mob2Δ::ARG4/mob2Δ::HIS1</i>                          | This study                  |
| JC599                     | <i>MOB2-HA-URA3/mob2Δ::ARG4</i>                                            | This study                  |
| JC613                     | <i>mob2-4S-HA-URA3/mob2Δ::ARG4</i>                                         | This study                  |
| JC620                     | <i>mob2-4E-HA-URA3/mob2Δ::ARG4</i>                                         | This study                  |
| JC645                     | <i>CBK1-myc-HIS1/cbk1Δ::URA3</i>                                           | This study                  |
| JC672                     | <i>CBK1-YFP-ARG4/cbk1Δ::HIS1</i>                                           | This study                  |
| JC785                     | <i>mob2-4A-HA-URA3/mob2Δ::ARG4</i>                                         | This study                  |
| JC843                     | <i>mob2-4A/S-HA-HIS1mob2Δ::ARG4</i>                                        | This study                  |
| JC871                     | <i>MOB2-YFP-ARG4/MOB2</i>                                                  | This study                  |
| JC877                     | <i>cdc28Δ::ARG4/URA3-pMET3-cdc28as MOB2-HA-SAT1</i>                        | This study                  |
| JC895                     | <i>MOB2-YFP-ARG4/mob2Δ::URA3</i>                                           | This study                  |
| JC921                     | <i>mob2-4A::URA3/mob2Δ::ARG4 SPA2-GFP-HIS1/SPA2</i>                        | This study                  |
| JC957                     | <i>mob2-4A-YFP-HIS1/mob2Δ::ARG4</i>                                        | This study                  |
| JC958                     | <i>mob2-4A-HA-URA3/mob2Δ::ARG4 KEL1-GFP-HIS1/KEL1</i>                      | This study                  |
| JC961                     | <i>mob2-4S::URA3/mob2Δ::ARG4 SPA2-GFP-HIS1/SPA2</i>                        | This study                  |
| JC964                     | <i>mob2-4A-HA-URA3/mob2Δ::ARG4 CBK1-myc-HIS1/CBK1</i>                      | This study                  |
| JC1000                    | <i>KEL1-YFP-HIS1/KEL1</i>                                                  | This study                  |
| JC1011                    | <i>KEL1-YFP-HIS1/KEL1 SPA2-CFP-URA3/SPA2</i>                               | This study                  |
| JC1031                    | <i>KEL1-YFP-HIS1/kel1Δ::ARG4</i>                                           | This study                  |

<sup>a</sup> The strains constructed in this study are all derivatives of BWP17

**Supplemental Table 2.** Primers used in this study.

| <b>Deletion and gene disruption</b>   |                                                                                                                                      |
|---------------------------------------|--------------------------------------------------------------------------------------------------------------------------------------|
| Name                                  | Sequence 5'-3'                                                                                                                       |
| <i>S1CBK1</i>                         | TTGAAAATAAAAGAAACTGAAAAGTAATAGCCACCAAGAGACTTTAATAACTGATTTTCTCGAGATACCTTAAAAGATCAAATAG<br>AGTTTTATAGATCTTGAAGCTTCGTACGCTGCAGGTC       |
| <i>S2CBK1</i>                         | TAGTGTGGTACGAGTAGAACCTTCATTATAAAACATGAAAAACAATCATTAAATATAGAGAGTGTGGGACGAACAACATATACA<br>TAGTTATTATTTACTCTGATATCATCGATGAATTCGAG       |
| <i>S1KEL1</i>                         | TTTCCCACGAGAAGAAATTTTAAATATAAATTTTCTTCACCGGTTTGTATCAACTAACCTCCACCCCCCCTCACTTCAAAT<br>TTGGATAATAATTTGAAGCTTCGTACGCTGCAGGTC            |
| <i>S2KEL1</i>                         | CCGTTTGATAGTTCCCAGGATAATAACTCGAATTCAGAGACGTAAACATTACATATTATATAAAAAATTTAAATATACACACAAA<br>CACACACATATAAATCTGATATCATCGATGAATTCGAG      |
| <i>S1MOB2</i>                         | GGAAAAGAGAAAGAGAGGAAAGAAAAATATAACAGGAATTGACAGAACAGGTGTTATAGATTACAGCCTTTTTTCATTAACC<br>AACTATATTAATTAGCGAAGCTTCGTACGCTGCAGGTC         |
| <i>S2MOB2</i>                         | ATACACGTACTATACTATACTATTCAATATATACACTAACTCAACAATTCAAGGCACTAAATAAGATCAATCTCGTAGTCTTGG<br>CAACATATAGCTTGTCTGATATCATCGATGAATTCGAG       |
| <b>Tagging</b>                        |                                                                                                                                      |
| Name                                  | Sequence 5'-3'                                                                                                                       |
| <i>S1CBK1myc</i>                      | TGCTAAGAATGGAGGCGGCAGAAAGAATCCAAAGGAAGATTTACCATTTATTGGATACACTTATTCTAGATTTGATTATTTGACA<br>AGAAAGAATGCG TTACGGATCCCCGGGTTAATTA         |
| <i>S2CBK1myc</i>                      | ATAATGCATAAACAATAACATCATCCGGCTGTACTACCATTCCAATGACCACCTATTGTTGATACATGTATGATAAGAAAAGGT<br>TGGCATGCTTTGTTGGAATTCGGAATTTTATGAGAA         |
| <i>S1MOB2HA</i>                       | GTCAAAGAGTTCAATTTGATTGATAGAACTGAAATGGAACCGTTGTACCTTTGTACCTTTGATAGAGAATTTGAACAACAAG<br>GAAAAATCACCCAAGCAAGCAAAACGCGTTATCCATATGATGTTCC |
| <i>S2MOB2HA</i>                       | CTATAGCATGGTAAGCGATAGATTTAGATACACAATTCAATTAGTTGCATTCAAACCAAGAAGTATGTATCATGCATTGCAATTG<br>CAATTCACACACAACAACGCCAGGGTTTTCCAGTCACGACG   |
| <i>S1MOB2myc</i>                      | GTCAAAGAGTTCAATTTGATTGATAGAACTGAAATGGAACCGTTGTACCTTTGATAGAGAATTTGAACAACAAGAAAAATCAC<br>CAAGCAAACGGATCCCCGGGTTAATTA                   |
| <i>S2MOB2myc</i>                      | CTATAGCATGGTAAGCGATAGATTTAGATACACAATTCAATTAGTTGCATTCAAACCAAGAAGTATGTAGATTCATGCATTGCAATT<br>CACAACAACCGAATTCGGAATTTTATGAGAA           |
| <i>S1CBK1XFP</i>                      | TTGAAAATAAAAGAAACTGAAAAGTAATAGCCACCACCAAGAGACTTTAATAAATGATTTTCTCGAGATACCTTAAAAGATCAAA<br>TAGAGTTTTATAGATCTTGAAGCTTCGTACGCTGC         |
| <i>S2CBK1XFP</i>                      | TAGTGTGGTACGAGTAGAACCTTCATTATAAAACATGAAAAACAATCATTAAATATAGAGAGTGTGGGACGAACAACATATACA<br>TAGTTATTATTTACTCTGATATCATCGATGAATTCGAG       |
| <i>S1KEL1XFP</i>                      | AGACTTGGAAGCTGACTTGTATATATTGAAACAAGAAAGAGATCAATTAAGACAATGTCCTTCGTTGAAAAACAACCTTAT<br>TTAGCTCAGAATCAAGGTGCTGGCGCAGGTGCTTC             |
| <i>S2KEL1XFP</i>                      | GAACAACCAAGTCCAGTCAACATGACTTCGAATCAACCATTCTCGTTTTTACATACCAGAACCAACACGTCCCCGCCAGTC<br>CCATTGGATGACGCTGATATCATCGATGAATTCGAG            |
| <i>S1MOB2XFP</i>                      | TCAATTTGATTGATAGAACTGAAATGGAACCGTTGTACCTTTGATAGAGAATTTGAACAACAAGAAAAATCACCCAAGCAAG<br>CAAATAGTAAACAAGGTGCTGGCGCAGGTGCTTC             |
| <i>S2MOB2XFP</i>                      | TTAATTCAATAAAAAATTTAAAAAGAACTATAGCATGGTAAGCGATAGATTTAGATACACAATTCAATTAGTTGCATTCAAACCA<br>AGAAGTATGTAGATAGCACCTGCGCCAGCCCCTGCGC       |
| <i>S2MOB2HA/<br/>XFP</i>              | AACTGTACTTACCAACGAAAACAACAAAAAAGGGGAAATAAATTGACCAGCAGTTTATTTCTTTTTGCTTGATCTAAAAGAA<br>AAGAATTTAGAACCGTCTGATATCATCGATGAATTCGAG        |
| <i>S1SPA2XFP</i>                      | TATTGCCAAATGTAATAAAGAAATTAGTCAAGACGGTGAAGAAGCTAGTCTTAAAGAAGATATTGCTTATCTTGATGCTAGAATA<br>AGTCAAAATCTTGAAGGTGCTGGCGCAGGTGCTTC         |
| <i>S2SPA2XFP</i>                      | TAAATTCACAGCATCATCAAAAATTCATGTCCAATACATTGATAATTCCTACAAATACAATTATAATATCAAAAATAATAAATTA<br>TTACATATACTATATCATCGATGAATTCGAG             |
| <b>Mob2 site-directed mutagenesis</b> |                                                                                                                                      |
| Name                                  | Sequence 5'-3'                                                                                                                       |
| <i>M1MOB2</i>                         | CCCCTCGAGGTCGACGGTATCGATAAGCTTGGGCGGGTATCCATTAAGCAAGGG                                                                               |



|                |                                                                                   |
|----------------|-----------------------------------------------------------------------------------|
| <i>M2AMOB2</i> | AGCAGACGTGTATGCAGCTGAGCCTTGTGCACCTTTTGAAGATAATTTTGAAGGGGCAAACCTGGTAGGTGCTTGTGTTTC |
| <i>M2EMOB2</i> | TTCAGACGTGTATGCAGCTGAGCCTTGTGCACCTTTTGAAGATAATTTTGAAGGTTCAAACCTGGTAGGTCTTGTGTTTC  |
| <i>M3AMOB2</i> | GCACAAGGCTCAGCTGCATACACGTCTGCTCCTACAAAGC                                          |
| <i>M3EMOB2</i> | GCACAAGGCTCAGCTGCATACACGTCTGAACCTACAAAGCGTAGC                                     |
| <i>M4AMOB2</i> | GTAGTCTGTATGGAAGAACGCTTCAGCGGTGCTACACTTC                                          |
| <i>M4EMOB2</i> | GTAGTCTGTATGGAAGAACGCTTCAGCGGTCTACACTTC                                           |
| <i>M5AMOB2</i> | GAAGTGTAGCACCGCTGAAGCGTTCTCCATACAGACTAC                                           |
| <i>M5EMOB2</i> | GAAGTGTAGAACCCTGAAGCGTTCTCCATACAGACTAC                                            |
| <i>M6MOB2</i>  | GGTGCGCGCCGCTCTAGAAGTGTGGATCCCTTGACAATTGCCTCGCTGGAGG                              |

### Integration

| Name             | Sequence 5'-3'                 |
|------------------|--------------------------------|
| <i>G1CBK1XFP</i> | ACAAACCATGCAAACATGGAG          |
| <i>G1CBK1</i>    | CACTTCAAAGCAATTTGAGAATACGCCTCC |
| <i>G2CBK1</i>    | GGTCATTCAAGGGTGAGCAAG          |
| <i>G1KEL1</i>    | CCATTTGGGAACCCCTAAAGTC         |
| <i>G4KEL1</i>    | GCCGCTGTATGTGCCACCAG           |
| <i>G1MOB2</i>    | CATGACGTAATGGGCCCAACATTATCCAG  |
| <i>G2BMOB2</i>   | CTTGACAATTGCCTCGCTGGAGG        |
| <i>MYC2</i>      | CACCGTCGAGTCCGTTCAAGTC         |
| <i>X2CaARG4</i>  | AATGGATCAGTGGCACCGGTG          |
| <i>X3CaARG4</i>  | GCTCTTGGTGGTACTGCTAAAAGTGCCG   |
| <i>X2CaHIS1</i>  | CAACGAAATGGCCTCCCCTACCACAG     |
| <i>X3CaHIS1</i>  | GACGAATTGAAGAAAGCTGGTGCAACCG   |
| <i>X2CaURA3</i>  | GTGTTACGAATCAATGGCACTACAGC     |
| <i>X3CaURA3</i>  | GGAGTTGGATTAGATGATAAAGGTGATGG  |
| <i>X2SAT1</i>    | GCACACACTACTTAATATACACAG       |
| <i>X3SAT1</i>    | GTGAAGTGTAAAGGGGGAG            |

### Quantitative RT-PCR

| Name                 | Sequence 5'-3'        |
|----------------------|-----------------------|
| <i>ADE2</i> forward  | TGTTGTCACATCTTCCATGC  |
| <i>ADE2</i> reverse  | ATTCCCACCAATGGAGATTC  |
| <i>CHT3</i> forward  | CTTCTAGAGCCGCTGGATCA  |
| <i>CHT3</i> reverse  | GCTCCAACCAGCTGAAACAT  |
| <i>SCW11</i> forward | GTCCGGCTCAGCCAACTACT  |
| <i>SCW11</i> reverse | GGATGATGCGGTTGTTGTTTC |

### MOB2 cloning

| Name                       | Sequence 5'-3'                      |
|----------------------------|-------------------------------------|
| <i>E1MOB2</i><br>(BamHI)   | GCGCGGATCCATGTCTTTTTTAAATACTATACGTG |
| <i>E2MOB2</i><br>(HindIII) | GCGCAAGCTTCTATTTGCTTGCTTGGGTGATTTTT |
